# Supplementary figures and images for: Total syntheses and configuration assignments of JBIR-04 and unantimycin A
Source: Royal Society of Chemistry journal article supplement (doi:10.1039/c7ob01732d), 2017-01-01

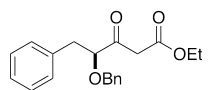

11

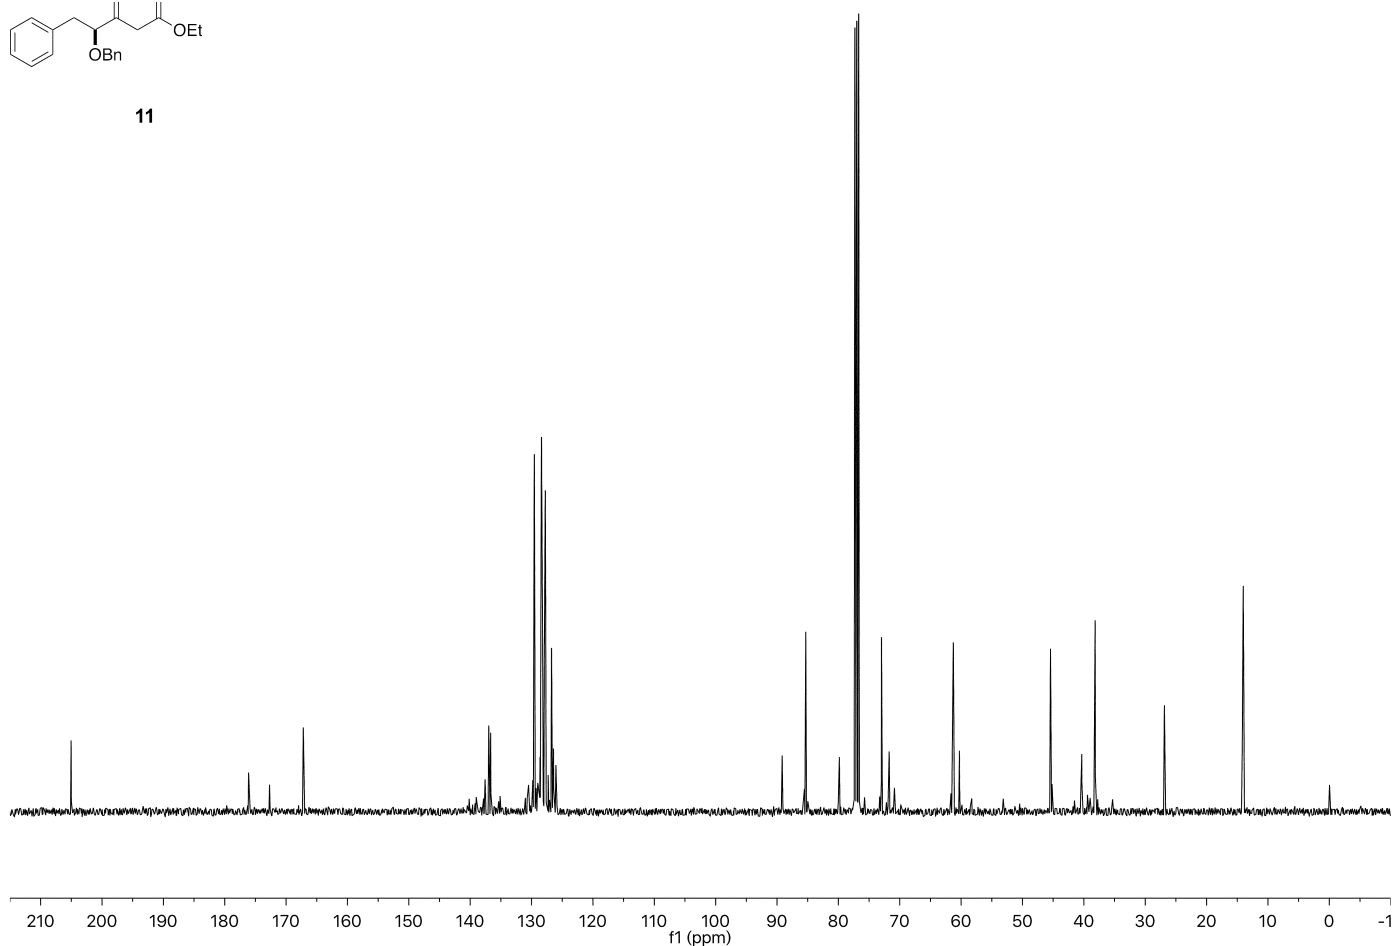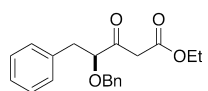

11

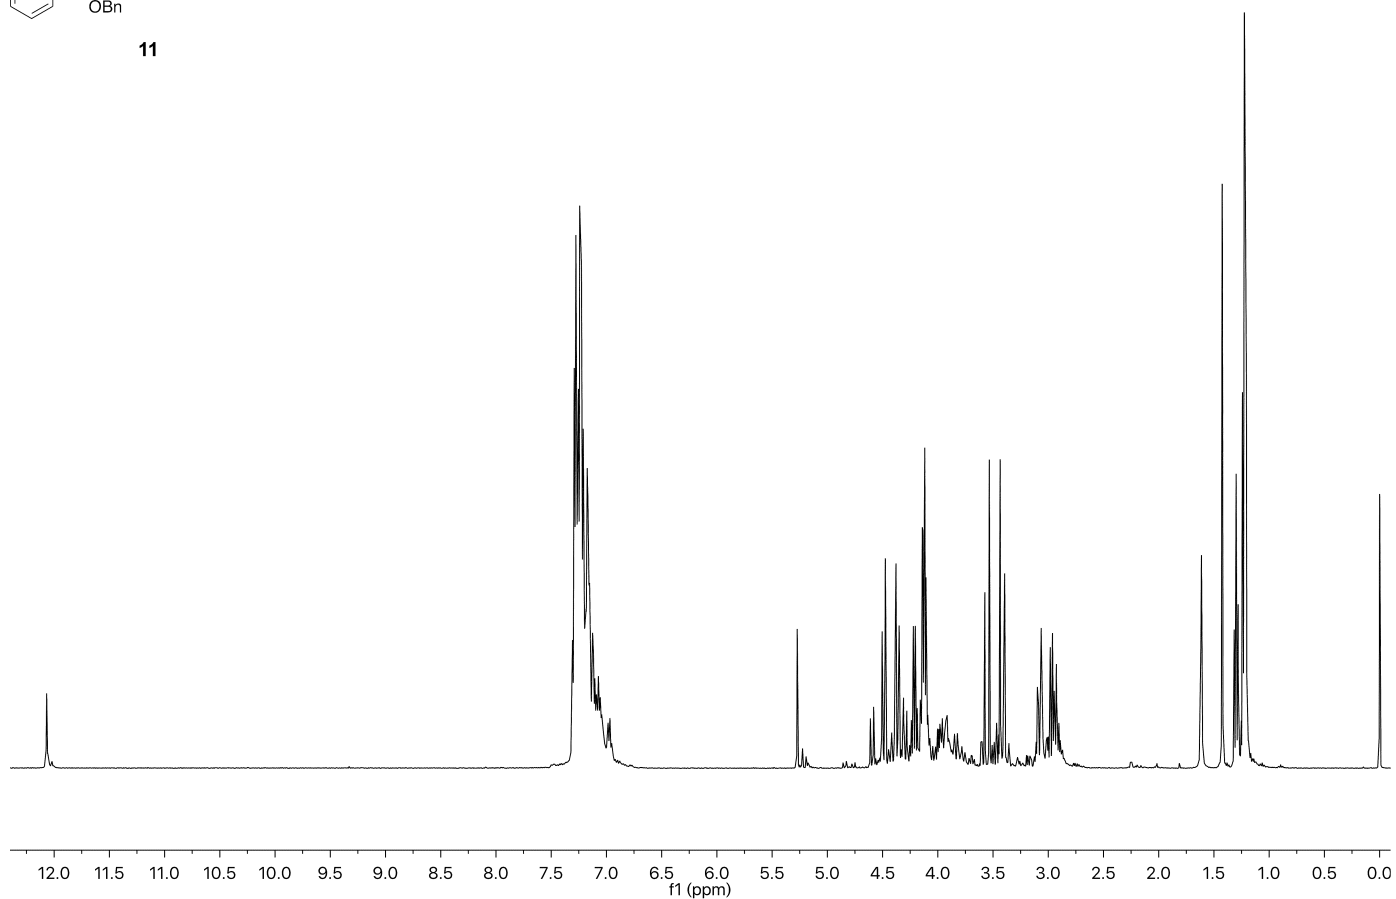

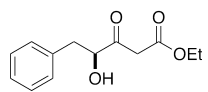

6

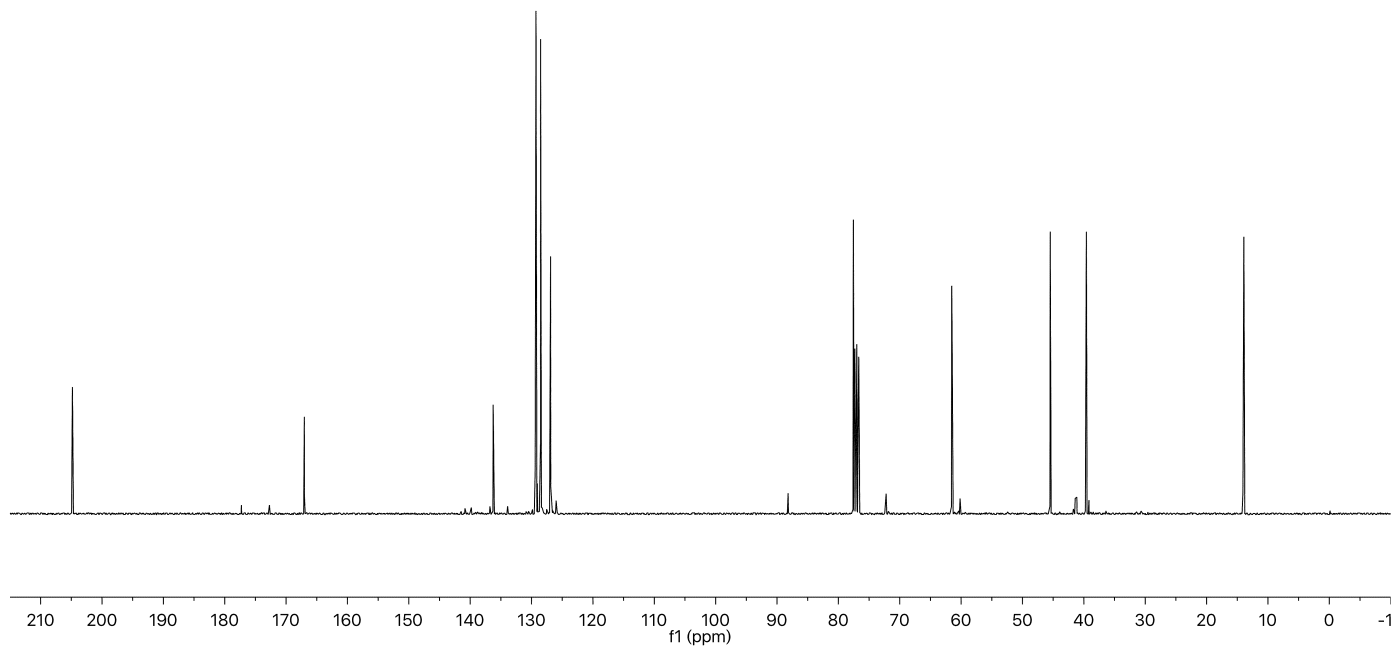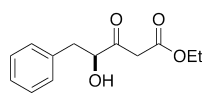

6

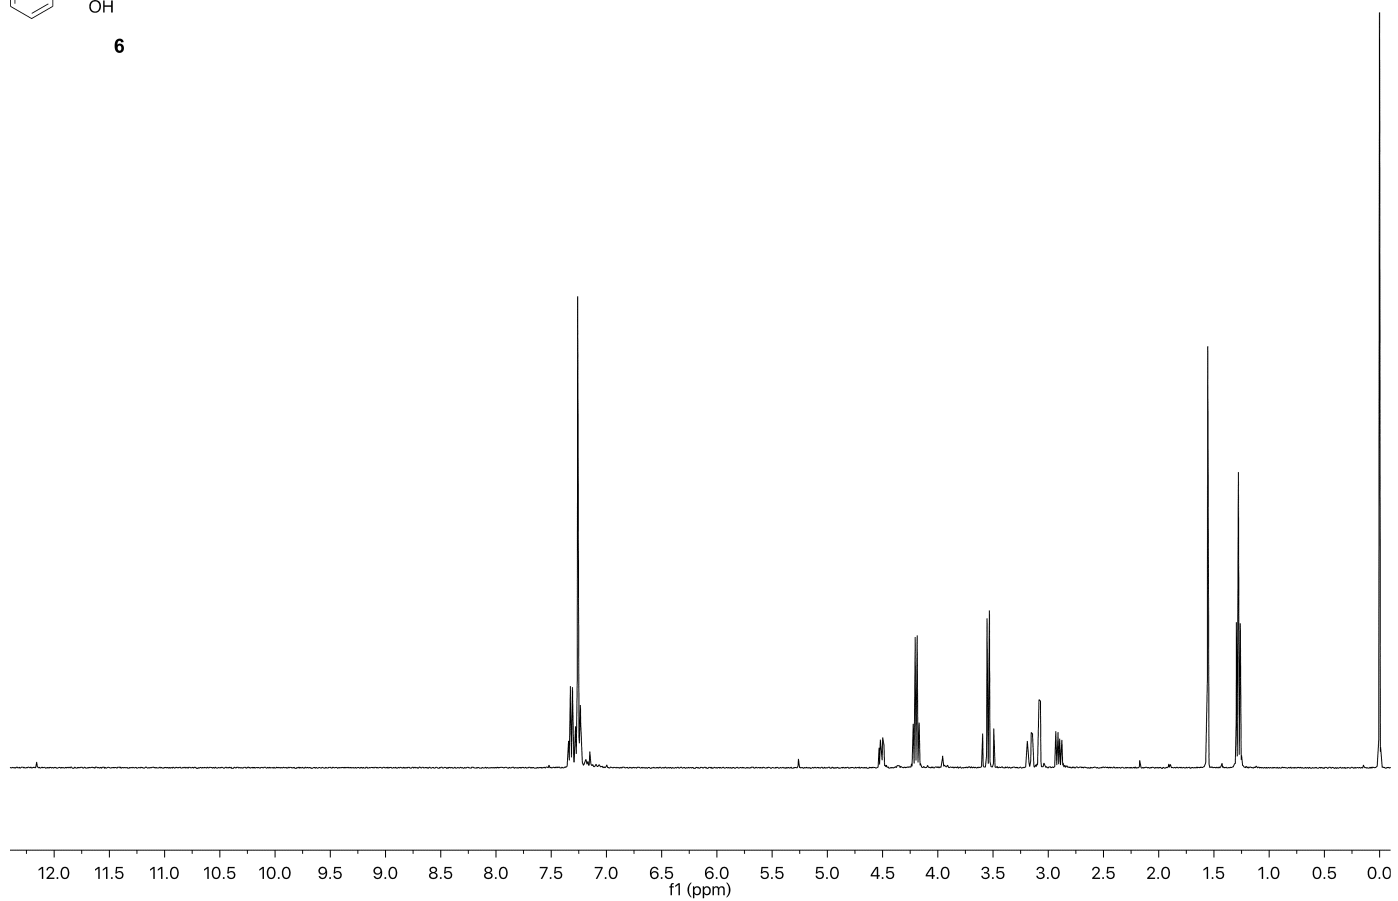

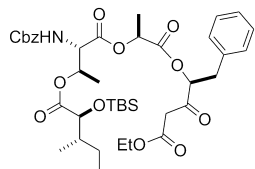

12

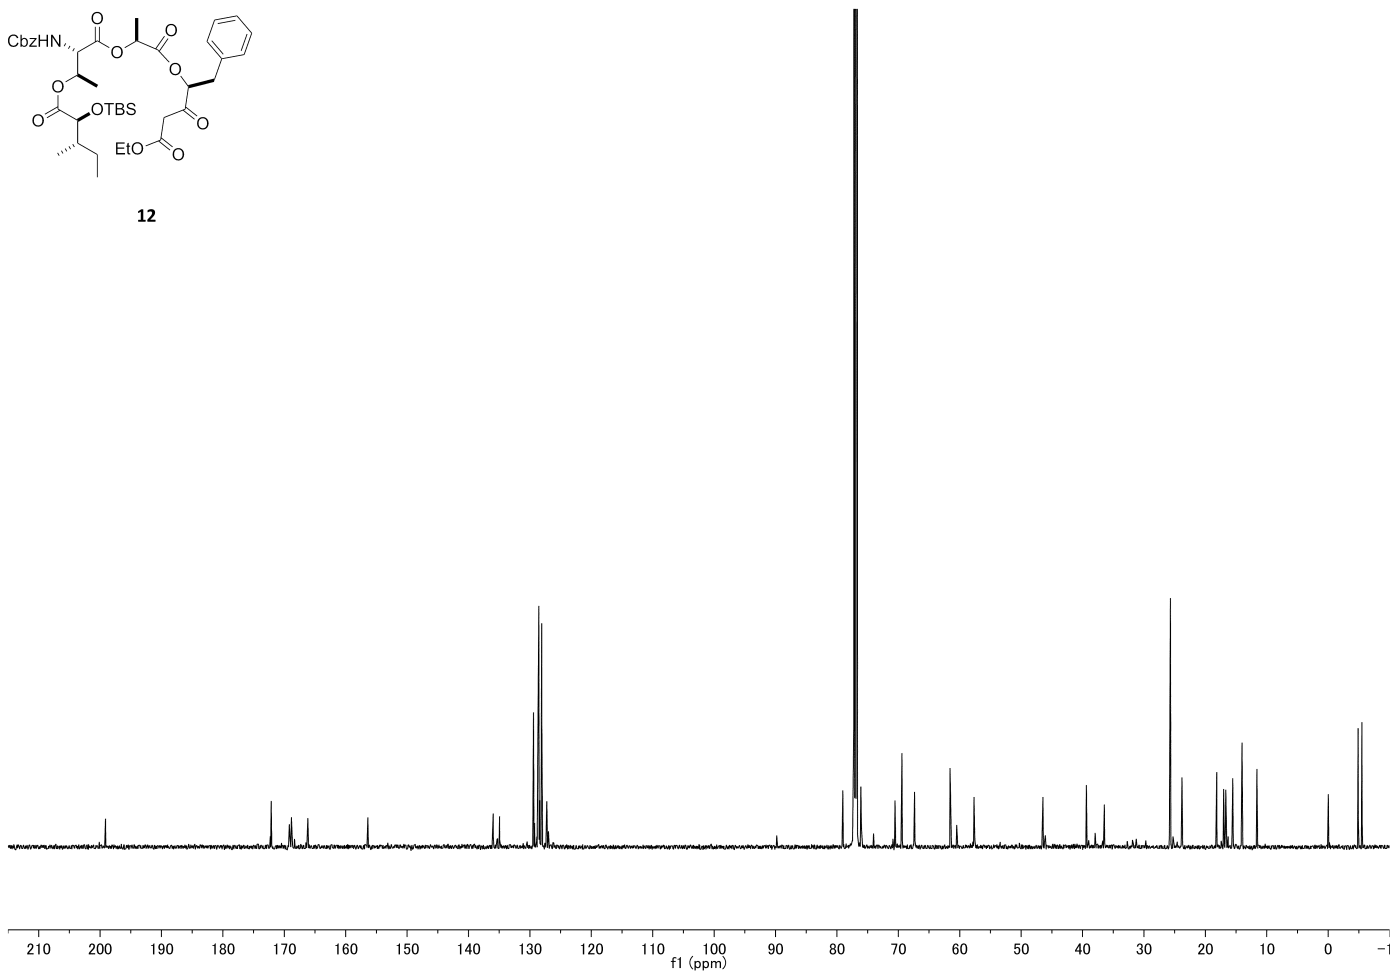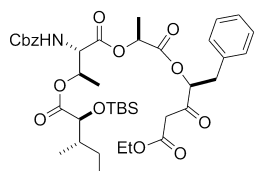

12

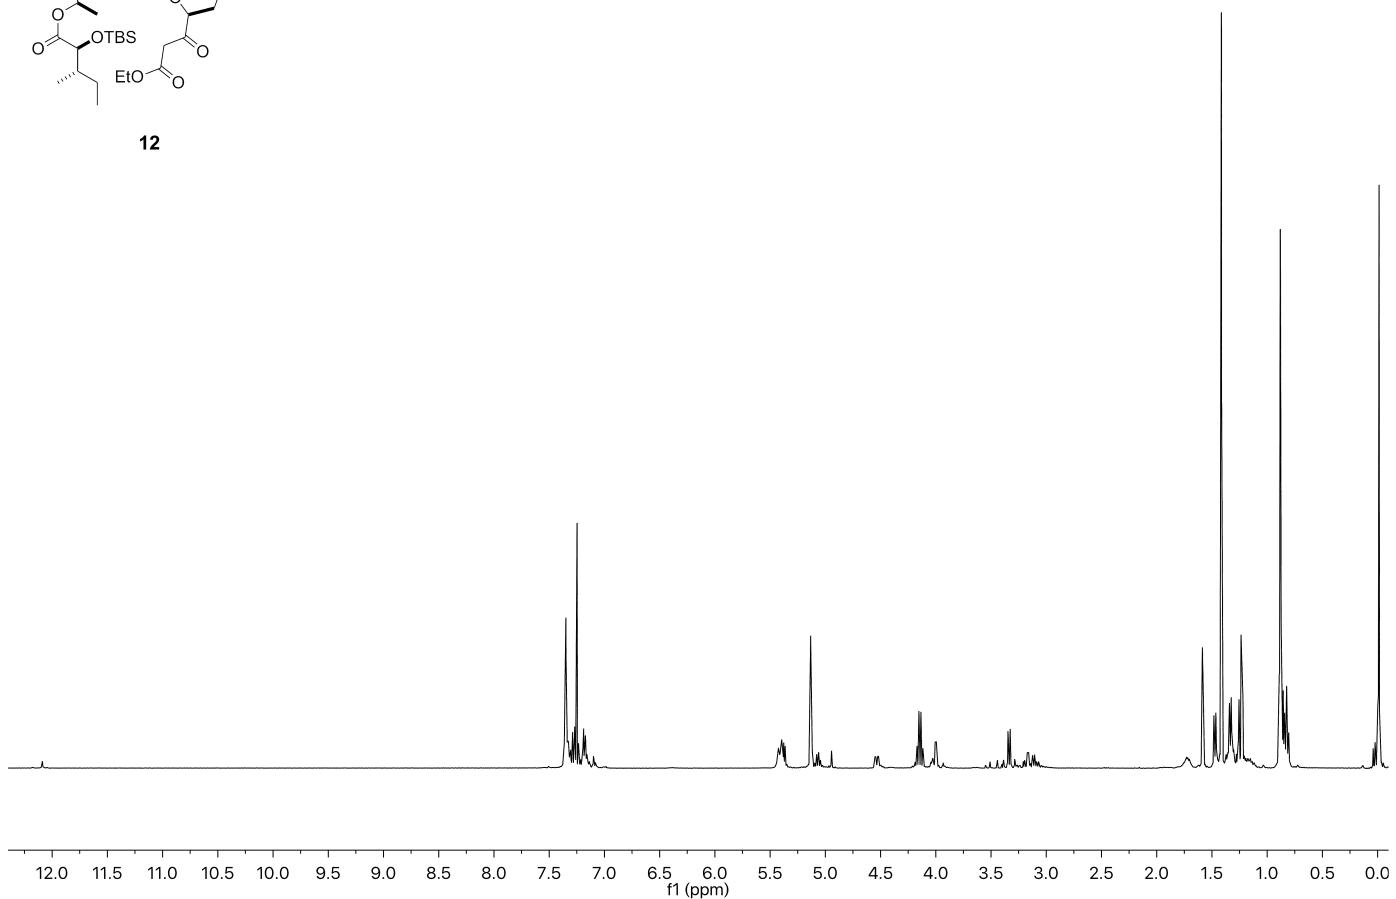

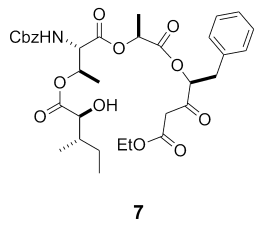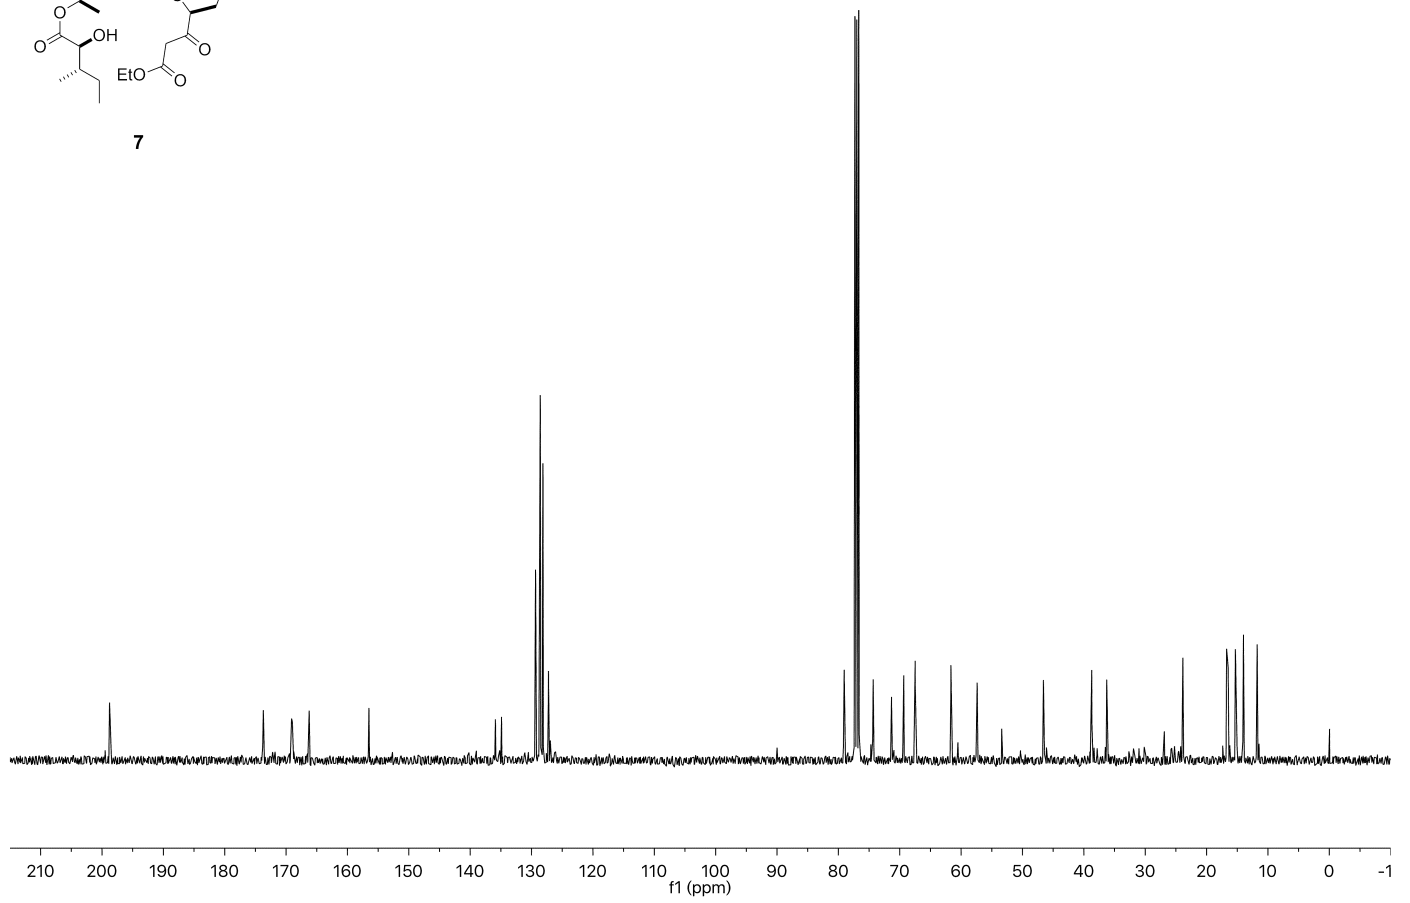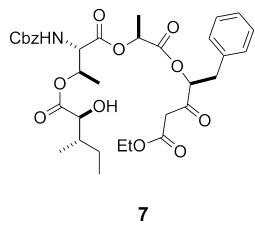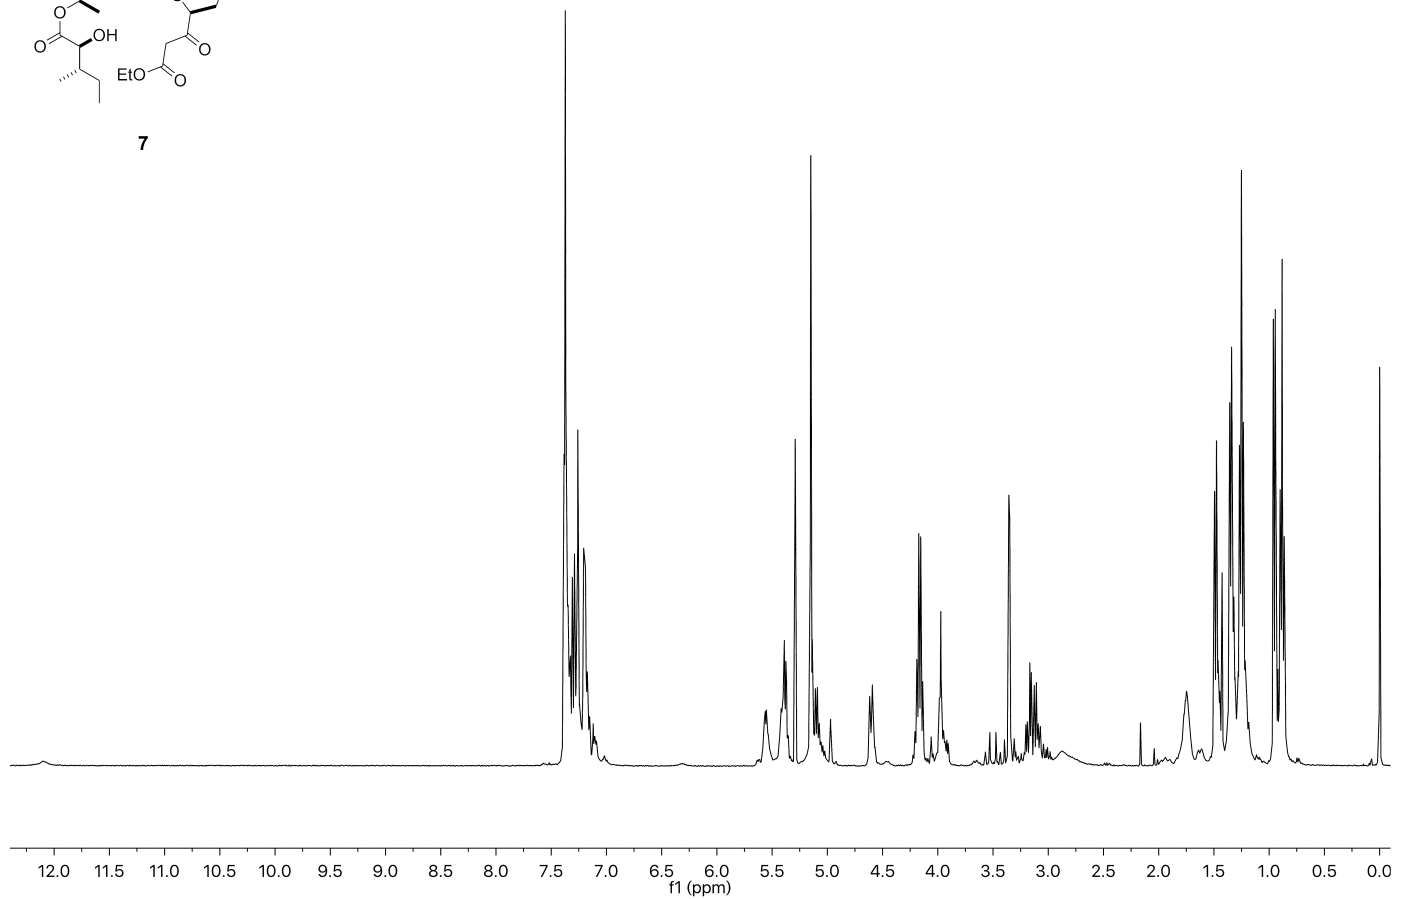

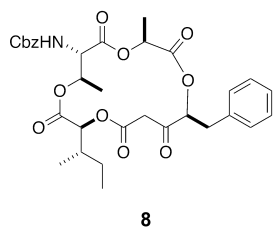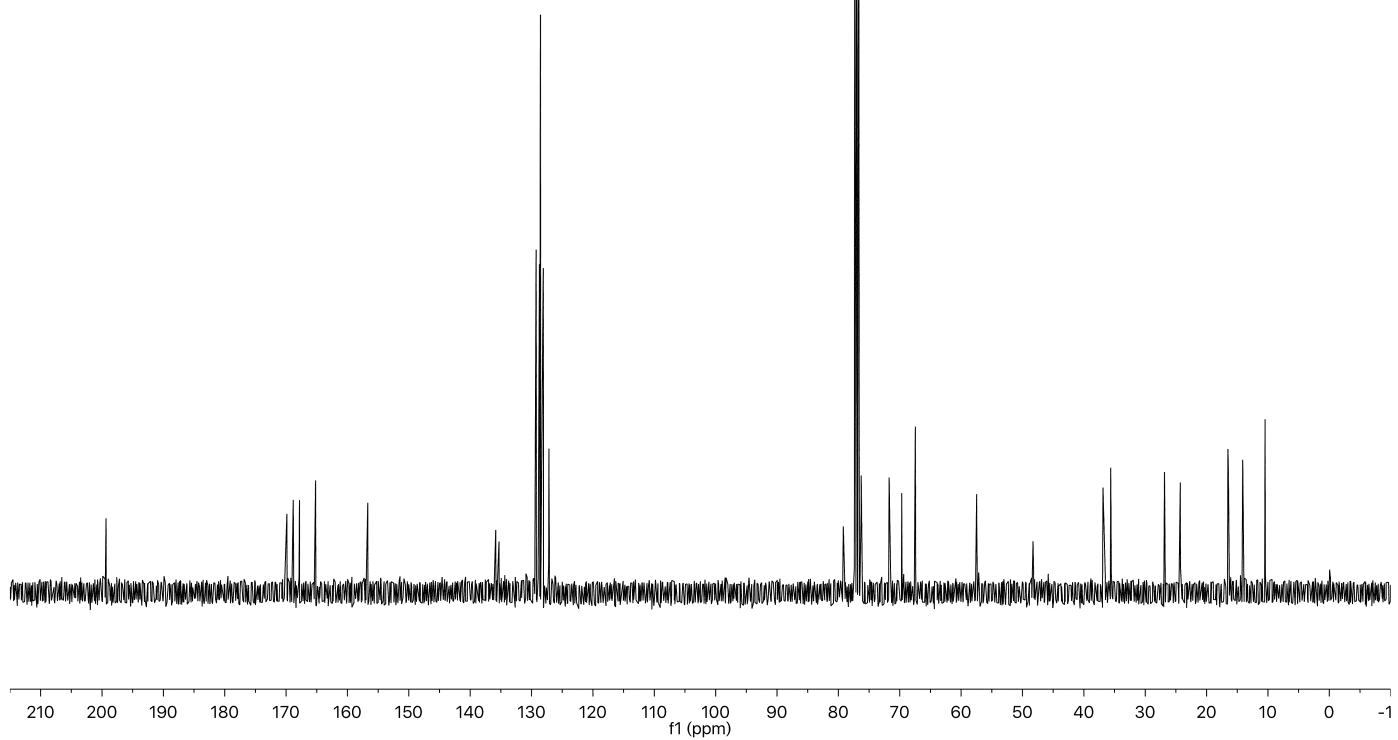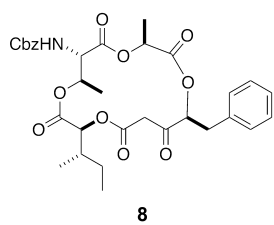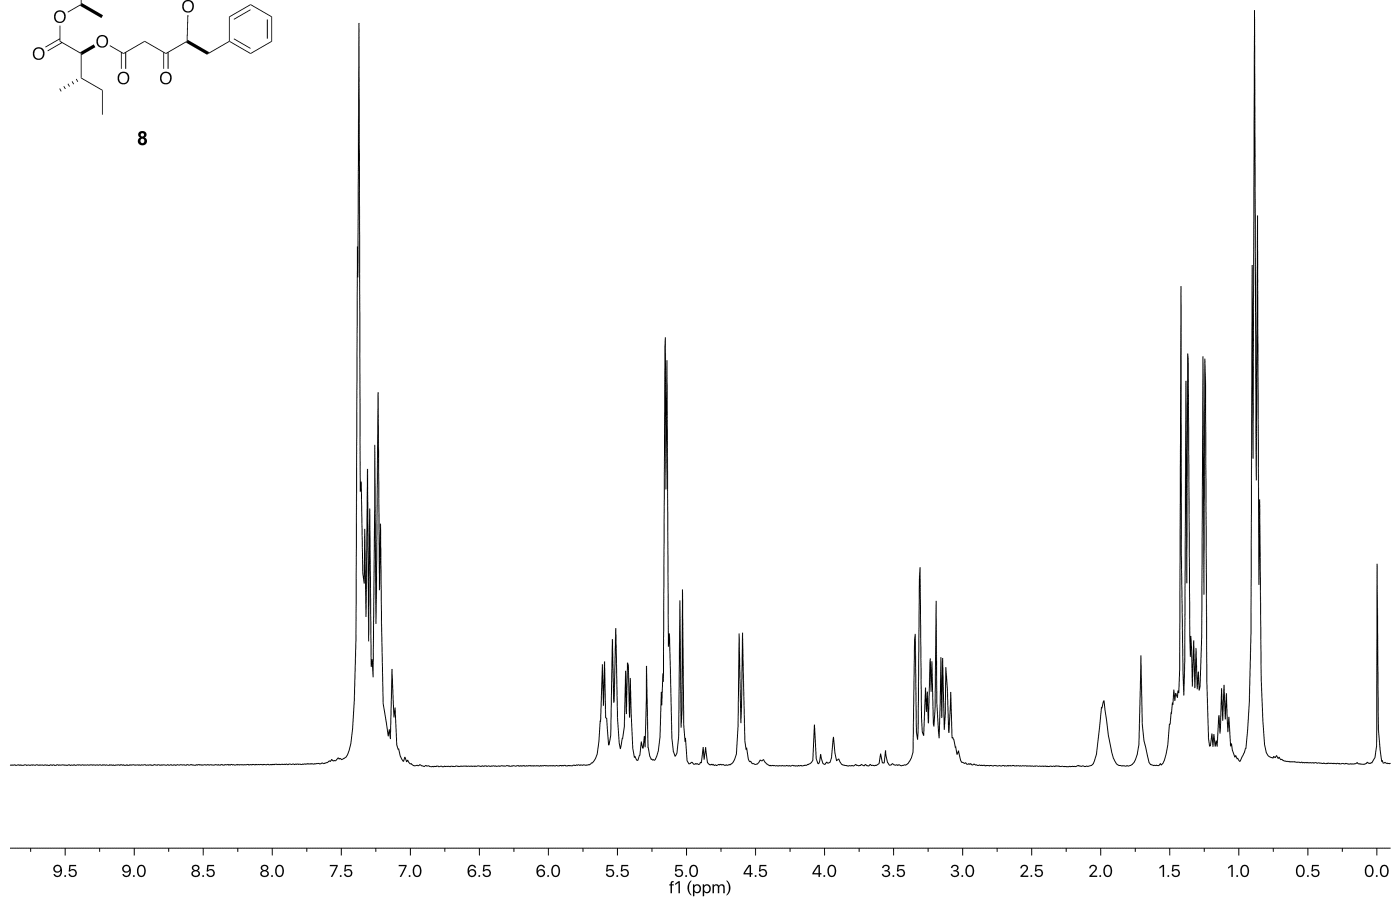

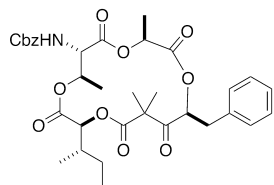

13

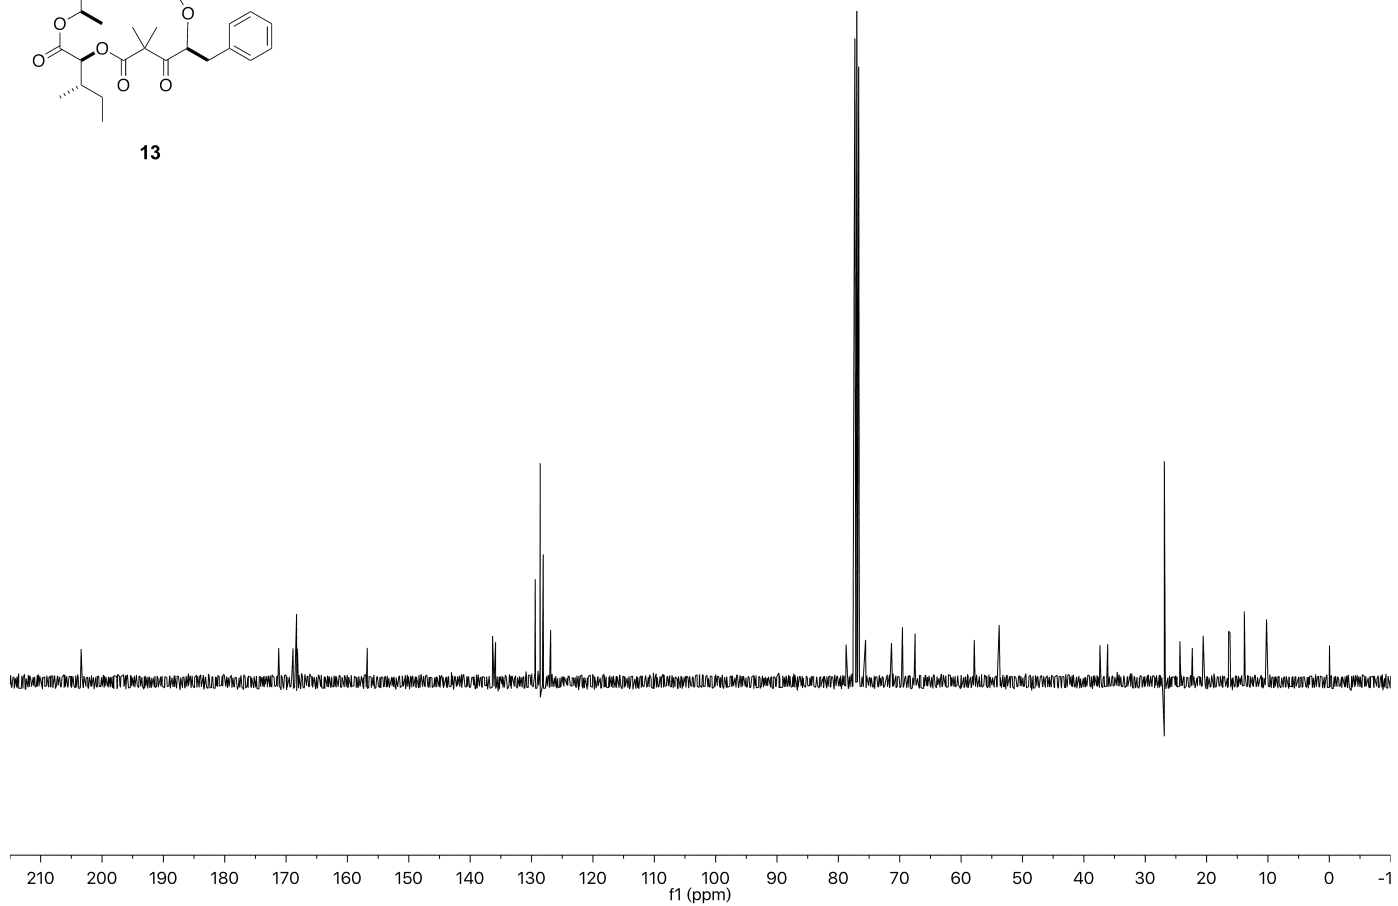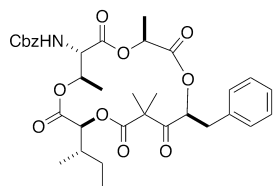

13

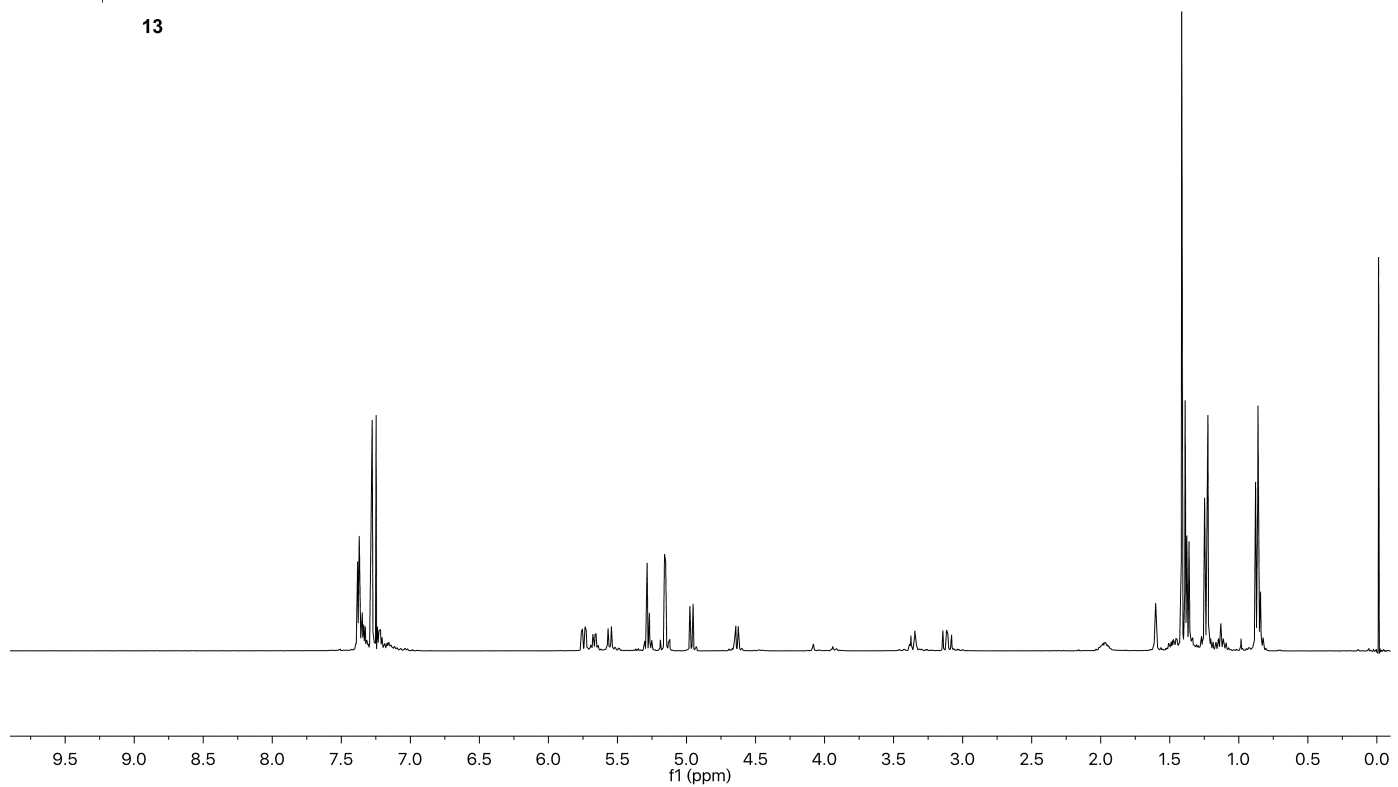

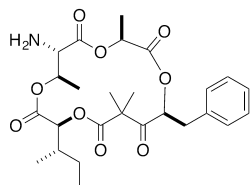

9

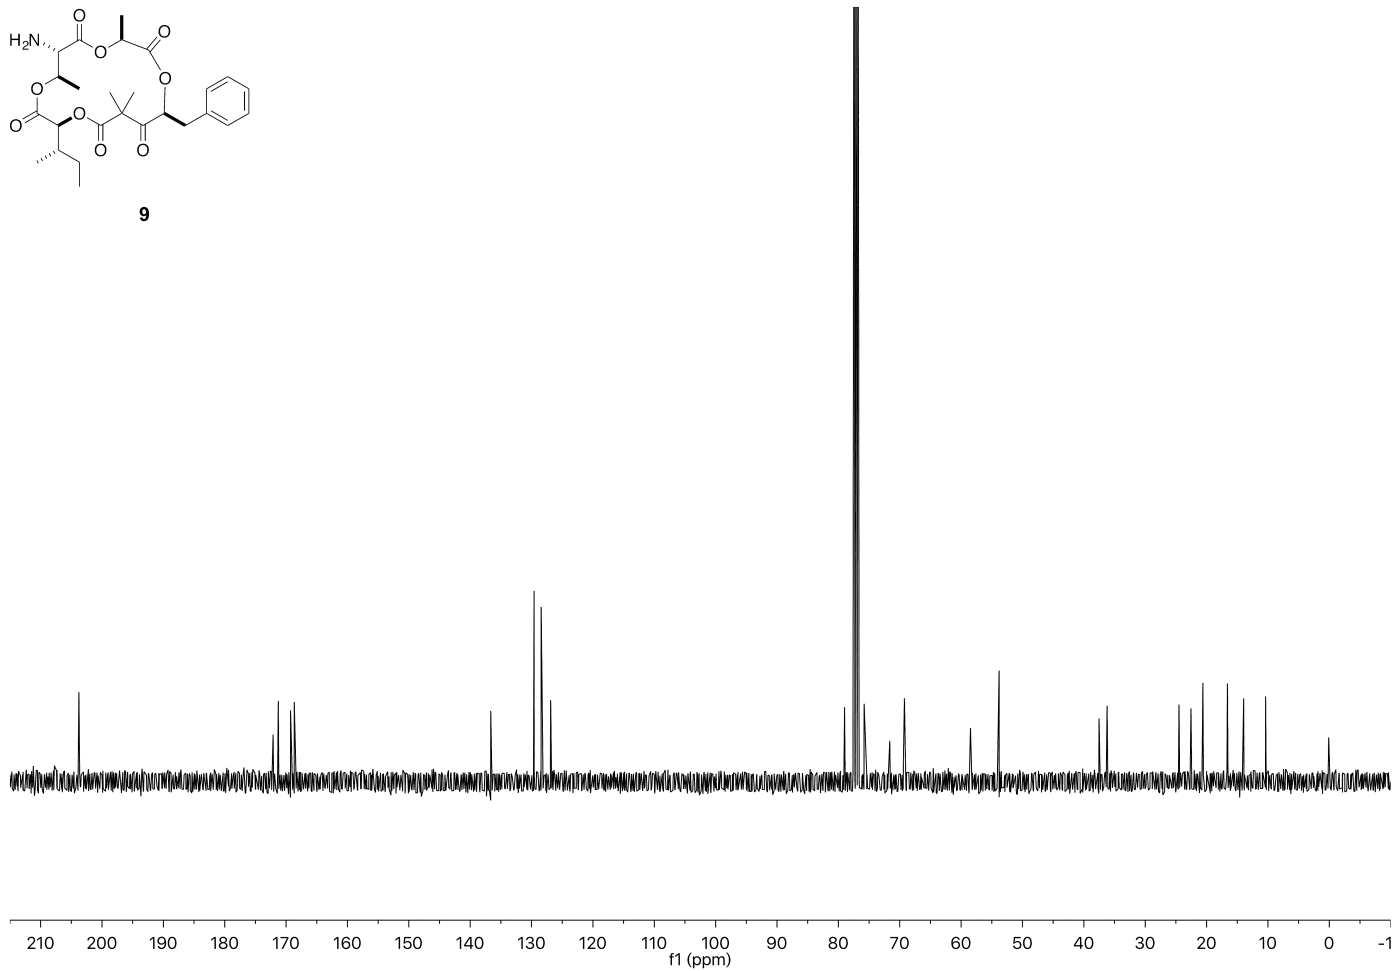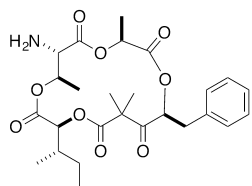

9

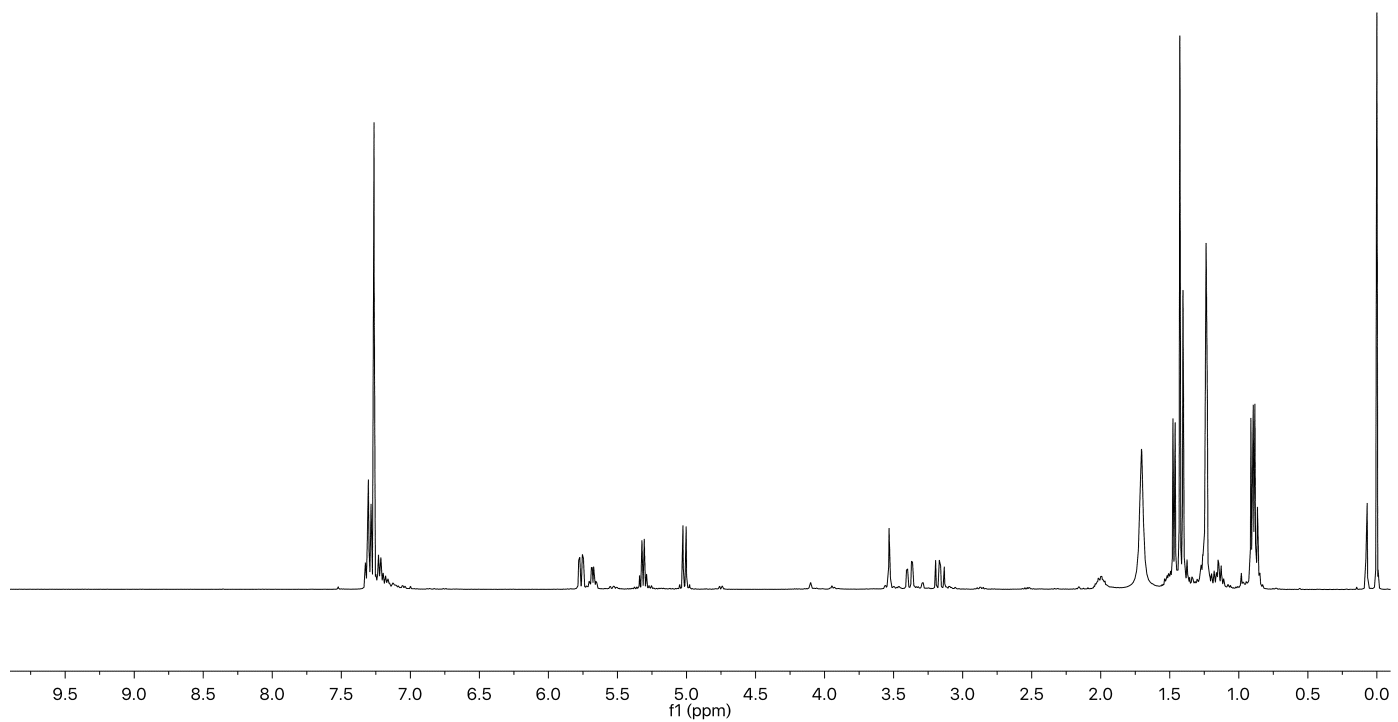

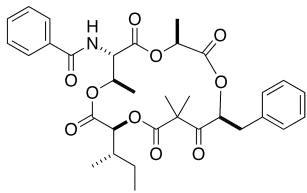

3

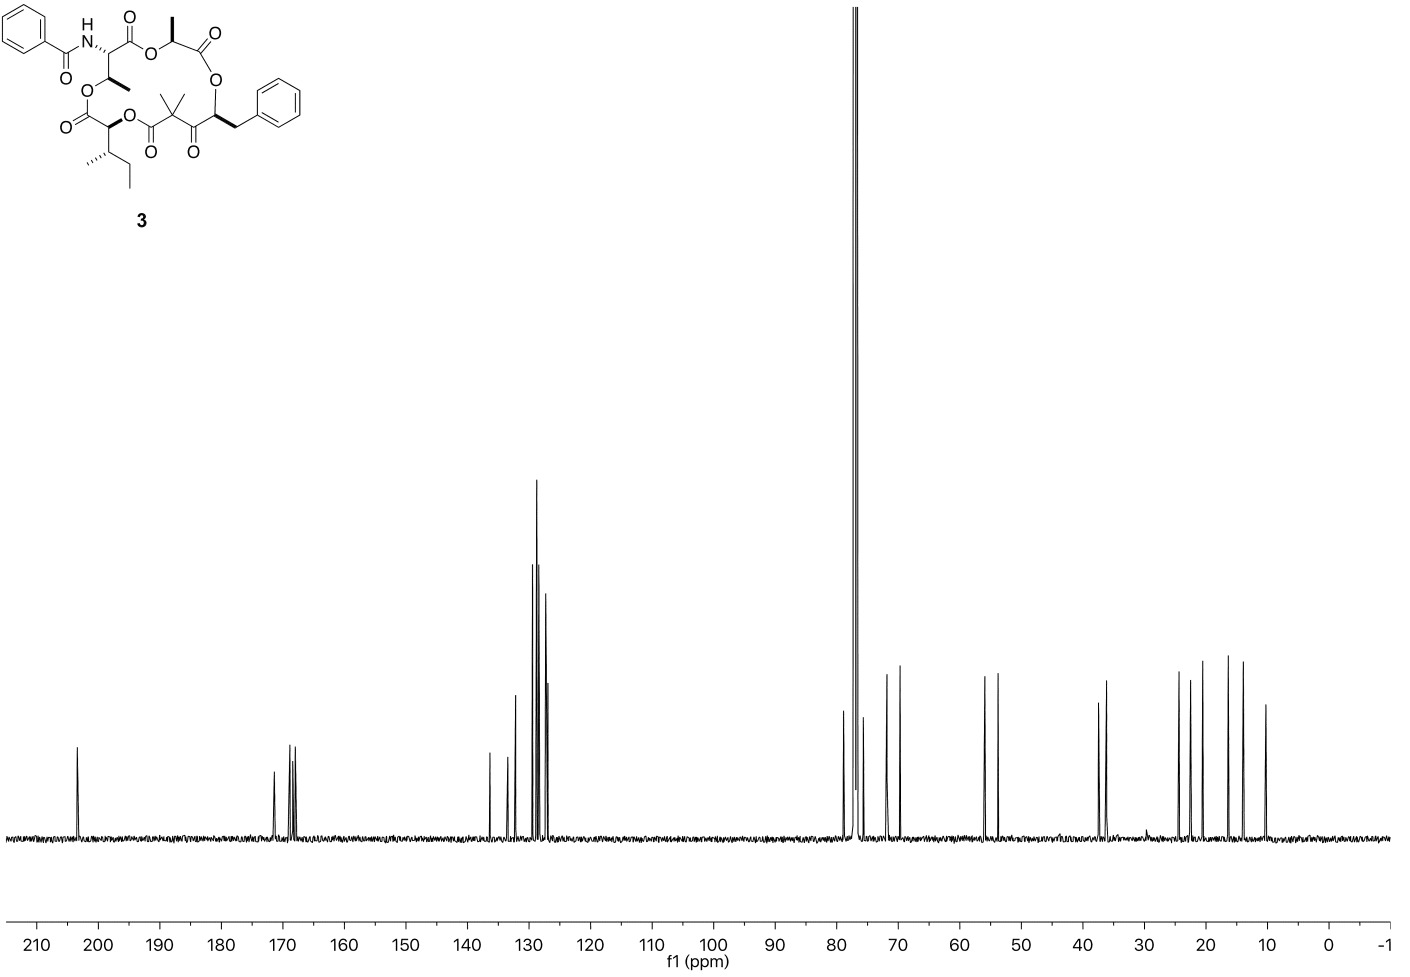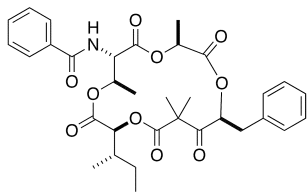

3

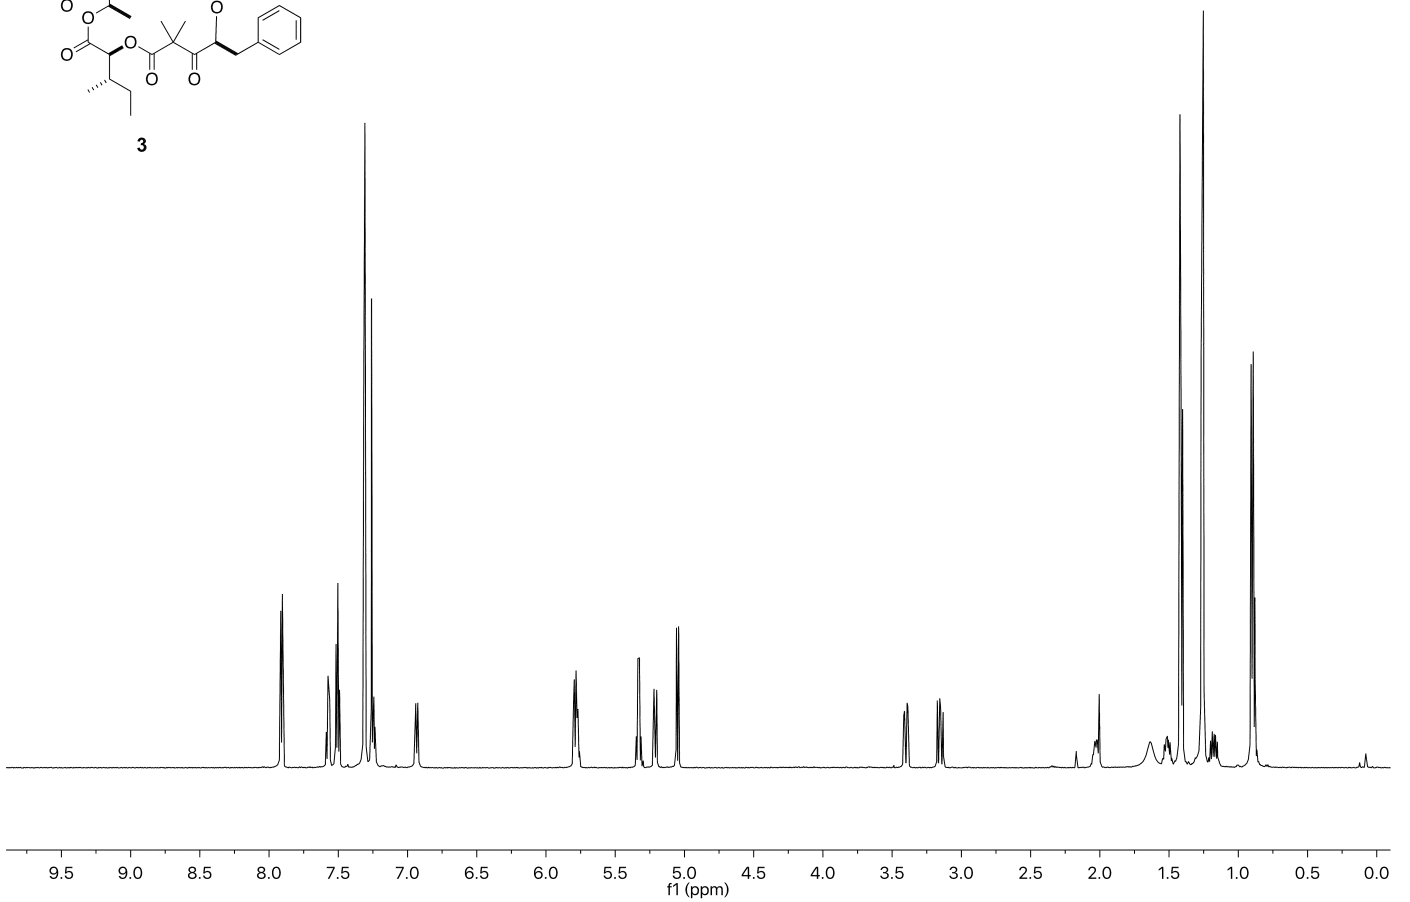



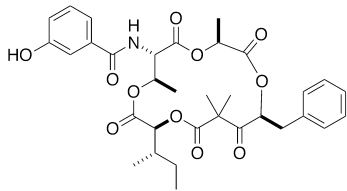

4

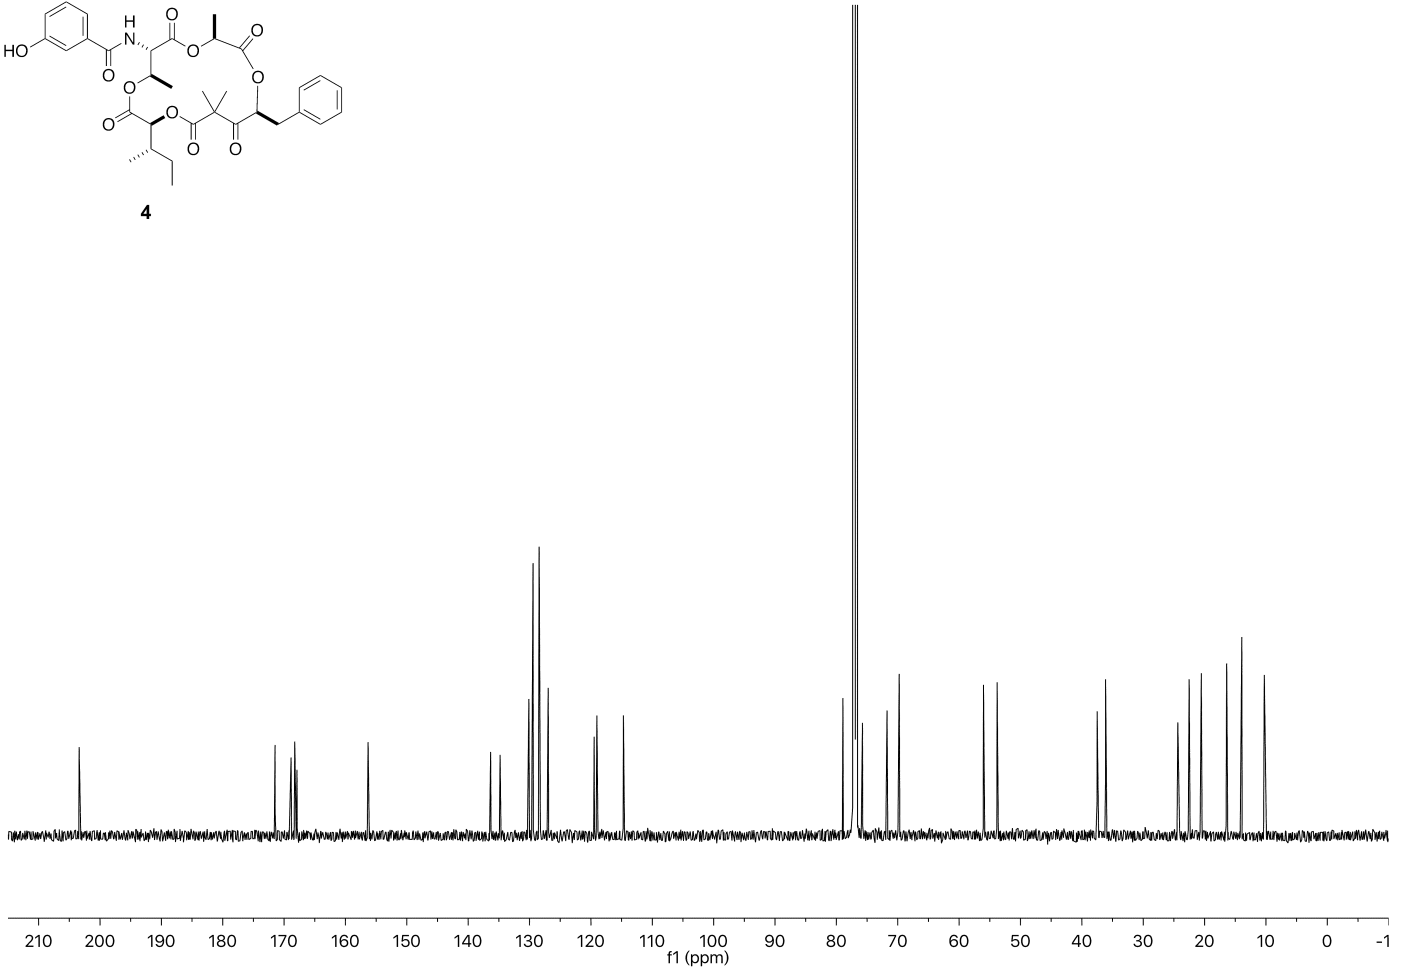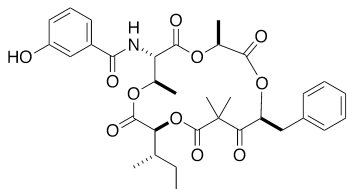

4

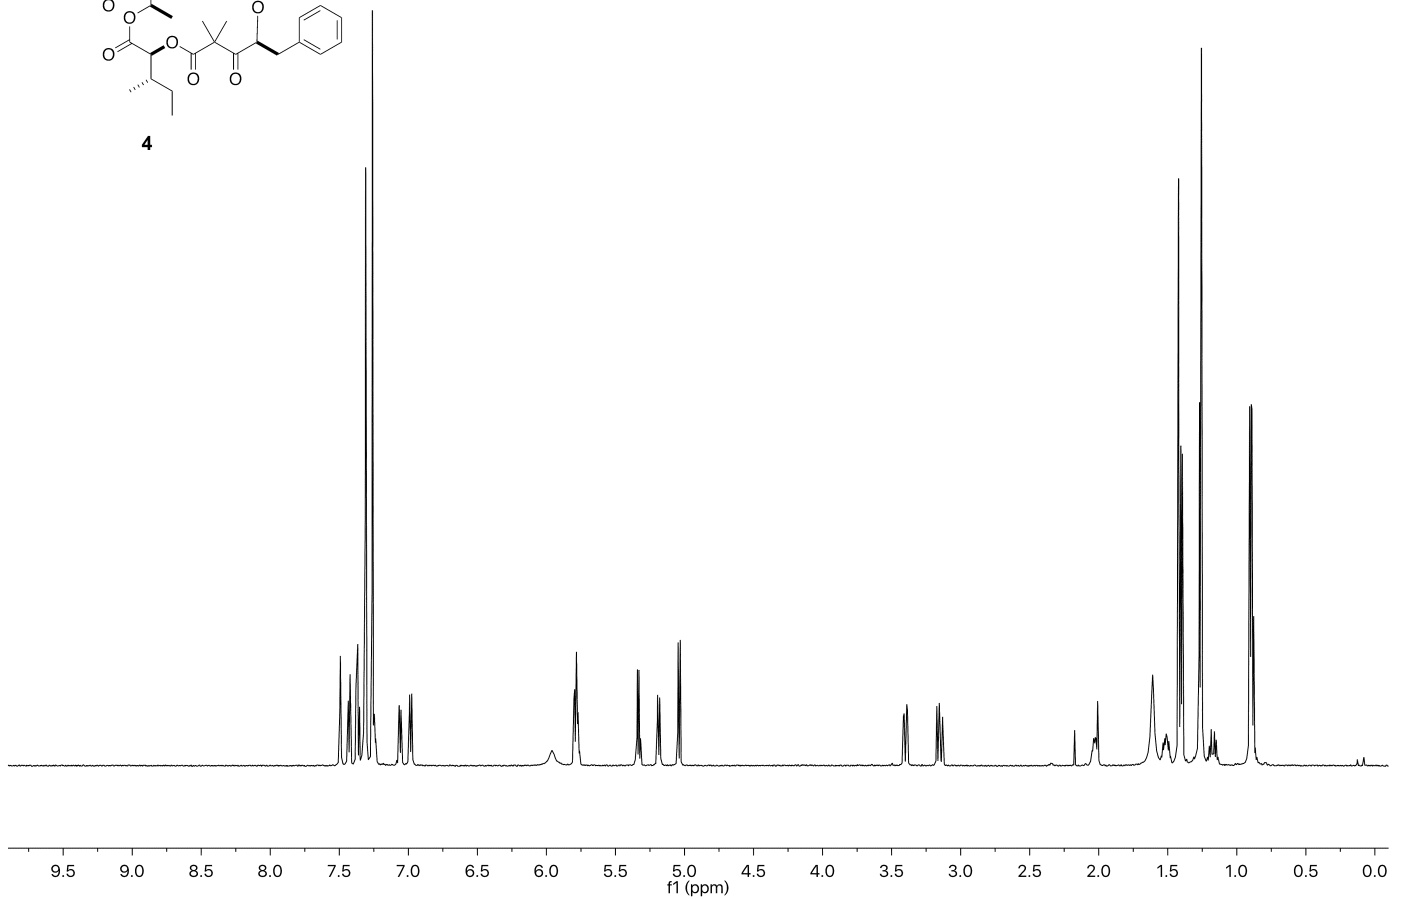

Supplement: c7ob01732d1.pdf [file c7ob01732d1.pdf]
